# Supplementary material
Source: Springer Nature journal article supplement (https://www.springermedizin.de/resource/supplementary/12877_2007_100_MOESM1_ESM.pdf/9441240)

**Cumulative prevalence of falling using recall data**

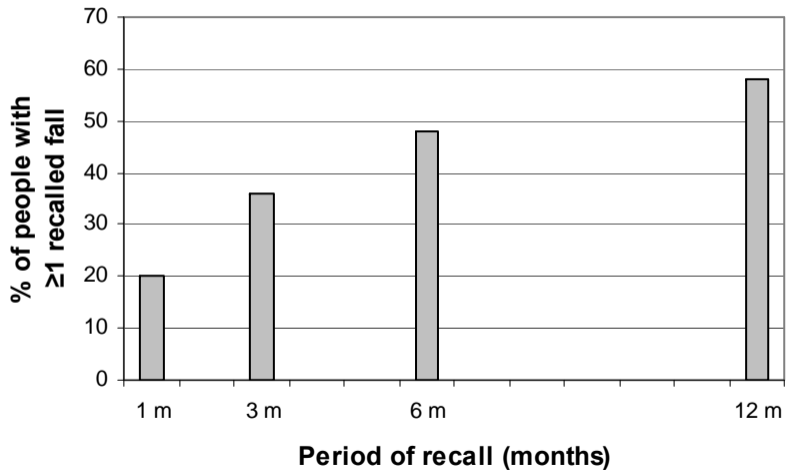

**Incidence of recalled falls**

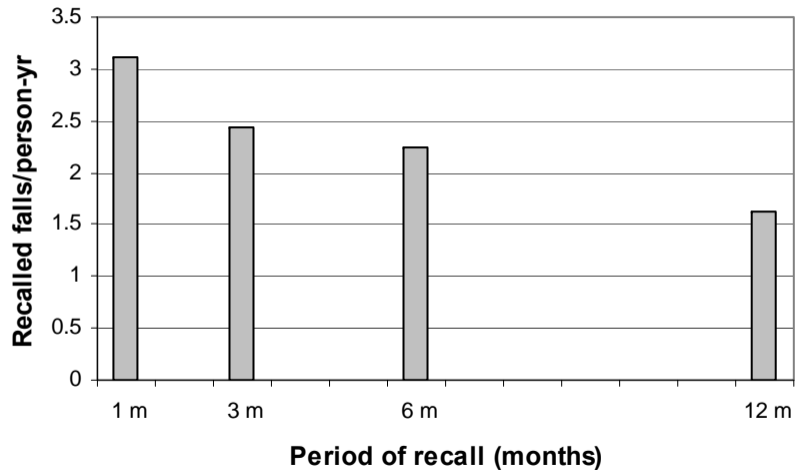

Supplement: MOESM1 [file 9441240]
